# Supplementary material for: Using Peer Review to Improve Lab Report Assignments
Source: Oxford University Press journal article supplement (doi:10.1525/abt.2018.80.4.301), 2018-03-23
Supplement: abt.2018.80.4.301-f2.docx [file abt.2018.80.4.301-f2.docx]

### SUPPLEMENTAL FILE – Student and GTA Questionnaires

### STUDENT SURVEY

### Background Information

- Year in School
- Gender
- Age
- Major
- Expected grade in course
- Which class(es) are you enrolled in?
  - EVPP 110
  - EVPP 111
- Have you taken either of the other EVPP courses?
  - EVPP 110 (when?)
  - EVPP 111 (when?)

### Previous Lab Report Experience

- Have you completed a lab report assignment for any other class prior to this one?
- Have any previous lab report assignments included a peer review component?
- If peer review was included as a component of previous lab report assignments, can you please describe the format of the peer review part?

If you prefer not to respond, please type “N/A”.

(Comment box for free-response)

### The Lab Report Itself

For the following questions, please respond to what you think about the following statements. There are no right or wrong answers.

- I think the science lab report is an important part of college laboratory courses. (5 point Likert scale, choose only one)

Strongly Disagree ~ Disagree ~ Neutral ~ Agree ~ Strongly Agree ~ N/A

- I think learning how to write lab reports is valuable because they may help me in the setting of workplace laboratories. (5 point Likert scale, choose only one)

Strongly Disagree ~ Disagree ~ Neutral ~ Agree ~ Strongly Agree ~ N/A

- What are the most challenging aspects of doing a lab report? Check all that apply.

• Analysis of Data

• Calculations

• Organization

• Writing

• None of the Above

• Prefer not to respond

• Other (please specify)

- When a lab report is evaluated and graded, what do you think are the most important elements that should be looked at? Check all that apply.

• Formatting

• Organization

• Accuracy of Data

• Discussion of Results

• Grammar

• Writing Style

• Writing Mechanics

• Figures, Tables, Graphs

• None of the Above

• Prefer not to respond

• Other (please specify)

- I felt prepared to write lab reports when I took my first lab course in college. (5 point Likert scale, choose only one)

Strongly Disagree ~ Disagree ~ Neutral ~ Agree ~ Strongly Agree ~ N/A

- In general, I believe that the instruction I have received about lab report writing during my lab course sessions has been effective and helpful. (5 point Likert scale, choose only one)

Strongly Disagree ~ Disagree ~ Neutral ~ Agree ~ Strongly Agree ~ N/A

- I feel that my lab instructor/TA has a responsibility to help me with my writing. (5 point Likert scale, choose only one)

Strongly Disagree ~ Disagree ~ Neutral ~ Agree ~ Strongly Agree ~ N/A

### Resources used for the Lab Report assignment

- Which of the following resources have you ever consulted with when writing lab reports? Check all that apply.

• Meeting with instructor/TA during office hours

• Meeting with Learning Assistants during office hours

• Participating in the in-class peer review component

• Written comments and feedback on graded lab reports

• Student writing center

• Online resources

• Advice from other students

• None of the above

• Prefer not to respond

• Other (please specify)

- Of the resources you have used, which do you feel was the most effective and helpful when writing lab reports? Why?

If you prefer not to respond, please type “N/A”.

(Comment box for free-response)

- Which of the following do you think would help your writing of lab reports the most? Check all that apply.

• Extended office hours of instructor/TA

• Lesson on lab report writing given by the instructor/TA

• A detailed template of a sample lab report

• A list of possible online resources about lab report writing

• A list of grading guidelines/rubric

• None of the above

• Prefer not to respond

• Other (please specify)

### Peer Review as part of the Lab Report assignment

- Did you participate in the peer review component of the lab report assignment this semester?

• yes

• no

For the following questions, please respond to what you think about the following statements. There are no right or wrong answers.

- I feel that I understood the instructions of the peer review component of the lab report. (5 point Likert scale, choose only one)

Strongly Disagree ~ Disagree ~ Neutral ~ Agree ~ Strongly Agree ~ N/A

- I feel that the peer review component helped improve my understanding of the lab report assignment. (5 point Likert scale, choose only one)

Strongly Disagree ~ Disagree ~ Neutral ~ Agree ~ Strongly Agree ~ N/A

- I feel that the peer review component helped improve my lab report grade. (5 point Likert scale, choose only one)

Strongly Disagree ~ Disagree ~ Neutral ~ Agree ~ Strongly Agree ~ N/A

- I feel that the peer review component of the lab report should be used every semester in this course. (5 point Likert scale, choose only one)

Strongly Disagree ~ Disagree ~ Neutral ~ Agree ~ Strongly Agree ~ N/A

- Would you make any changes to the peer review component of the lab report? If so, what are they?

If you prefer not to respond, please type “N/A”.

(Comment box for free-response)

### Comments/Reflection

- Please add any final comments or thoughts you may have. We especially welcome suggestions on ways to improve the lab report assignment. If there are any questions that were not asked that you feel should have been asked, please indicate those as well.

(Comment box for free-response)

**SURVEY FOR GRADUATE TEACHING ASSISTANTS**

**Part I: Lab reports as part of undergrad science courses**

- I feel that teaching students how to write a lab report is an important part of college lab courses. (5 point Likert scale, choose only one)

Strongly Disagree ~ Disagree ~ Neutral ~ Agree ~ Strongly Agree ~ N/A

- I think that the skills required to write a good lab report are valuable because they carry over into the setting of workplace laboratories. (5 point Likert scale, choose only one)

Strongly Disagree ~ Disagree ~ Neutral ~ Agree ~ Strongly Agree ~ N/A

- What do you think the purpose of the lab report is?

If you prefer not to respond, please type “N/A”.

(Comment box for free-response)

- Please list the features of a satisfactory lab report.

If you prefer not to respond, please type “N/A”.

(Comment box for free-response)

- Please list the features of an unsatisfactory lab report.

If you prefer not to respond, please type “N/A”.

(Comment box for free-response)

**Part II. The Laboratory Report Itself**

- What do you think the purpose of the lab report is?
- Why do you think the lab report is important in college-level lab courses?
- How much value do you think the lab report carries in the setting of workplace laboratories?
  - Why do you think that is the case?
- What elements of writing do you focus on the most when evaluating lab reports?
  - Tell me why that is so.
- Based on your experience, what elements of lab report writing do you believe students find the most challenging?
- When you evaluate lab reports, where do you notice students struggle the most?
  - How do you account for these struggles?

**Part III: The peer review component of the lab report assignment**

- I think that the peer review component of the lab report helped my students better understand the lab report requirements. (5 point Likert scale, choose only one)

Strongly Disagree ~ Disagree ~ Neutral ~ Agree ~ Strongly Agree ~ N/A

- I think that the peer review component of the lab report helped my students earn higher grades on the lab report assignment. (5 point Likert scale, choose only one)

Strongly Disagree ~ Disagree ~ Neutral ~ Agree ~ Strongly Agree ~ N/A

- I would incorporate the peer review component in future lab report assignments. (5 point Likert scale, choose only one)

Strongly Disagree ~ Disagree ~ Neutral ~ Agree ~ Strongly Agree ~ N/A

**Part IV. Comments/Reflection**

Please add any final comments or thoughts you may have. If there are any questions that were not asked that you feel should have been asked, please indicate those as well.

(Comment box for free-response)
